# Supplementary material for: Mining the Roles of Wheat (Triticum aestivum) SnRK Genes in Biotic and Abiotic Responses
Source: Front Plant Sci. 2022 Jun 30;13:934226. doi: 10.3389/fpls.2022.934226 (PMC9280681; doi:10.3389/fpls.2022.934226)
Supplement: Supplementary Material 3 — Information including chromosomal location, protein features, subcellular localization, and source of 186 SnRK proteins identified in wheat. [file Table_3.xls]

## Sheet: Sheet1
Supplementary file 3. Information including chromosomal location, protein features, subcellular localization, and source of 186 SnRKs identified in Triticum aestivum.
Name	Gene ID	Locus ID	Thematic structure of protein				Tertiary Structural Template	MW	pI	ato	stability	GRAVY	Sub	Sig	Chr	Location (bp)		Source of Information
			Alpha helix	Beta turn	Extended strand	Random coil										start	end
SnRK1
TaSnRK1.1-A	TraesCS1A02G350500	TraesCS1A02G350500.1	155AA/30.82%	35AA/6.96%	96AA/19.9%	217AA/43.14%	6b1u.3	57.2814	8.77	8113	unstable	-0.266	Nucleus	no	1A	535314301	535318863	identifed in this study
TaSnRK1.1-B	TraesCS1B02G364800	TraesCS1B02G364800.1						56.962	8.77	8071	unstable	-0.268	Nucleus	no	1B	595180174	595184776	identifed in this study
TaSnRK1.1-D	TraesCS1D02G353300	TraesCS1D02G353300.1						56.962	8.77	8071	unstable	-0.268	Nucleus	no	1D	439024110	439028908	identifed in this study
TaSnRK1.2-A	TraesCS3A02G282800	TraesCS3A02G282800.1	149AA/29.62%	30AA/5.96%	97AA/19.28%	227AA/45.13%	6b1u.3	57.4925	8.58	8131	unstable	-0.362	Nucleus	no	3A	511074224	511079007	identifed in this study
TaSnRK1.2-B	TraesCS3B02G316500	TraesCS3B02G316500.1						57.4765	8.58	8130	unstable	-0.352	Nucleus	no	3B	508251776	508256166	identifed in this study
TaSnRK1.2-D	TraesCS3D02G282800	TraesCS3D02G282800.1						57.4354	8.58	8124	unstable	-0.351	Nucleus	no	3D	390665442	390670462	identifed in this study
TaSnRK1.3-B;a	TraesCS4B02G195900	TraesCS4B02G195900.1						58.7098	8.55	8258	unstable	-0.312	Nucleus	no	4B	422030176	422034573	identifed in this study
TaSnRK1.3-B;b		TraesCS4B02G195900.2						54.5699	8.46	7658	unstable	-0.344	Nucleus	no	4B	422030802	422034573	identifed in this study
TaSnRK1.3-A	TraesCS4A02G108700	TraesCS4A02G108700.1	126AA/36.00%	31AA/8.86%	60AA/17.14%	133AA/38.00%	6c9h.2	40.1454	8.04	5655	stable	-0.274	Nucleus	no	4A	127282109	127289564	identifed in this study
TaSnRK1.3-D	TraesCS4D02G196100	TraesCS4D02G196100.1						54.5699	8.46	7658	unstable	-0.344	Nucleus	no	4D	340548384	340554595	identifed in this study
TaSnRK1.4-B;a	TraesCS3B02G544400	TraesCS3B02G544400.1	159AA/36.05%	27AA/6.12%	82AA/18.59%	173AA/39.23%	6b1u.3	50.7848	6.33	7154	stable	-0.207	Nucleus	no	3B	781835471	781843487	identifed in this study
TaSnRK1.4-B;b		TraesCS3B02G544400.2						50.913	6.33	7171	stable	-0.214	Nucleus	no	3B	781835471	781843487	identifed in this study
TaSnRK1.4-B;c		TraesCS3B02G544400.3						41.5675	5.76	5814	unstable	-0.318	Nucleus	no	3B	781836336	781843487	identifed in this study
TaSnRK1.5-B;a	TraesCS3B02G545300	TraesCS3B02G545300.1	139AA/31.74%	33AA/7.53%	74AA/16.89%	192AA/43.84%	6b1u.3	50.2689	8.7	7069	stable	-0.362	Nucleus	no	3B	782340879	782343873	identifed in this study
TaSnRK1.5-B;b		TraesCS3B02G545300.2						50.3971	8.79	7090	stable	-0.37	Nucleus	no	3B	782340879	782343873	identifed in this study
TaSnRK1.6-D;a	TraesCS3D02G491900	TraesCS3D02G491900.1	167AA/32.36%	39AA/7.56%	99AA/19.19%	211AA/40.89%	6b1u.3	58.9011	8.53	8315	unstable	-0.292	Nucleus	no	3D	585709691	585715328	identifed in this study
TaSnRK1.6-D;b		TraesCS3D02G491900.2						66.5873	8.87	9419	unstable	-0.287	Nucleus	no	3D	585709691	585715328	identifed in this study
TaSnRK1.7-B	TraesCS3B02G544300	TraesCS3B02G544300.1	179AA/38.41%	31AA/6.65%	68AA/14.59%	188AA/40.34%	6c9h.2	53.3897	6.86	7528	unstable	-0.222	Nucleus	no	3B	781552088	781555666	identifed in this study
TaSnRK1.8-B	TraesCS3B02G544700	TraesCS3B02G544700.1	168AA/32.81%	34AA/6.64%	93AA/18.16%	217AA/42.38%	6c9h.2	58.4366	8.65	8252	stable	-0.282	Nucleus	no	3B	782111947	782117692	identifed in this study
TaSnRK1.9-A	TraesCS4A02G108800	TraesCS4A02G108800.1	173AA/33.99%	35AA/6.88%	91AA/17.88%	210AA/41.26%	6b1u.3	58.2503	8.55	8194	unstable	-0.318	Nucleus	no	4A	127481061	127489170	identifed in this study
TaSnRK1.10-B	TraesCS3B02G802600LC	TraesCS3B02G802600LC.1	53AA/51.46%	6AA/5.83%	11AA/10.68%	33AA/32.04%	6b1u.3	12.0227	5.2	1666	stable	-0.528	Nucleus	no	3B	781670646	781671360	identifed in this study
SnRK2
TaSnRK2.1-A	TraesCS1A02G215900	TraesCS1A02G215900.1	142AA/41.52%	16AA/4.68%	50AA/14.62%	134AA/39.18%	3zuu.2	38.6099	5.43	5427	unstable	-0.431	Nucleus	no	1A	381819326	381822599	identifed in this study
TaSnRK2.1-B	TraesCS1B02G229400	TraesCS1B02G229400.1						38.663	5.52	5438	unstable	-0.435	Nucleus	no	1B	411987863	411990884	identifed in this study
TaSnRK2.1-D	TraesCS1D02G218200	TraesCS1D02G218200.1						38.5489	5.73	5424	stable	-0.424	Nucleus	no	1D	304838300	304841343	TaSnRK2.3 (Tian et al. 2013)
TaSnRK2.2-A	TraesCS1A02G270800	TraesCS1A02G270800.1	136AA/37.78%	23AA/6.39%	62AA/17.22%	139AA/38.61%	3zuu.2	41.2168	5.48	5769	unstable	-0.454	Nucleus	no	1A	464837012	464840398	identifed in this study
TaSnRK2.2-B	TraesCS1B02G281100	TraesCS1B02G281100.1						41.2699	5.56	5776	unstable	-0.468	Nucleus	no	1B	489249385	489253102	identifed in this study
TaSnRK2.2-D	TraesCS1D02G271000	TraesCS1D02G271000.1						42.3901	5.48	5930	unstable	-0.432	Nucleus	no	1D	365727612	365731332	identifed in this study
TaSnRK2.3-A;a	TraesCS2A02G163800	TraesCS2A02G163800.1	127AA/35.98%	22AA/6.23%	64AA/18.13%	140AA/39.66%	3zuu.2	40.0008	5.53	5607	stable	-0.201	Nucleus	no	2A	116013921	116019018	TaSnRK2.2 (Zhang et al. 2016)
TaSnRK2.3-A;b		TraesCS2A02G163800.2						38.6362	5.45	5413	stable	-0.215	Nucleus	no	2A	116013921	116019018	identifed in this study
TaSnRK2.3-A;c		TraesCS2A02G163800.3						39.3811	5.55	5522	stable	-0.205	Nucleus	no	2A	116013921	116019018	identifed in this study
TaSnRK2.3-B;a	TraesCS2B02G189600	TraesCS2B02G189600.1						40.0149	5.62	5614	stable	-0.197	Nucleus	no	2B	165115341	165119793	identifed in this study
TaSnRK2.3-B;b		TraesCS2B02G189600.2						38.6362	5.45	5413	stable	-0.209	Nucleus	no	2B	165115341	165119793	identifed in this study
TaSnRK2.3-D	TraesCS2D02G170700	TraesCS2D02G170700.1						38.6643	5.45	5419	stable	-0.208	Nucleus	no	2D	114550221	114555142	identifed in this study
TaSnRK2.4-A	TraesCS2A02G303900	TraesCS2A02G303900.1	130AA/36.41%	19AA/5.32%	52AA/14.57%	156AA/43.70%	3zuu.2	40.9115	5.55	5715	unstable	-0.529	Nucleus	no	2A	522072400	522077216	identifed in this study
TaSnRK2.4-B	TraesCS2B02G320500	TraesCS2B02G320500.1						40.9115	5.55	5715	unstable	-0.529	Nucleus	no	2B	457108855	457113685	identifed in this study
TaSnRK2.4-D	TraesCS2D02G302500	TraesCS2D02G302500.1						40.9396	5.55	5721	unstable	-0.522	Nucleus	no	2D	386248395	386253037	TaSnRK2.7 (Zhang et al. 2011)
TaSnRK2.5-A	TraesCS2A02G493800	TraesCS2A02G493800.1	124AA/36.26%	23AA/6.73%	52AA/15.20%	143AA/41.81%	3zuu.2	38.7933	5.59	5418	stable	-0.246	Nucleus	no	2A	726029783	726034011	TaSnRK2.1 (Zhang et al. 2016)
TaSnRK2.5-B	TraesCS2B02G521800	TraesCS2B02G521800.1						38.9985	5.47	5428	stable	-0.278	Nucleus	no	2B	716809651	716816243	identifed in this study
TaSnRK2.5-D	TraesCS2D02G493700	TraesCS2D02G493700.1						38.8473	5.66	5424	stable	-0.249	Nucleus	no	2D	591027189	591031752	identifed in this study
TaSnRK2.6-A	TraesCS2A02G566700	TraesCS2A02G566700.1	160AA/40.92%	26AA/6.65%	57AA/14.58%	148AA/37.85%	3ujg.2	43.9697	6.15	6113	stable	-0.499	Nucleus	no	2A	765760972	765762877	identifed in this study
TaSnRK2.6-B	TraesCS2B02G630000	TraesCS2B02G630000.1						44.211	6.15	6149	unstable	-0.481	Nucleus	no	2B	801162070	801163970	TaSnRK2.5 (Zhang et al. 2016)
TaSnRK2.6-D	TraesCS2D02G577000	TraesCS2D02G577000.1						43.9276	6.15	6104	unstable	-0.511	Nucleus	no	2D	640297481	640299386	identifed in this study
TaSnRK2.7-A	TraesCS3A02G381100	TraesCS3A02G381100.1	150AA/41.32%	21AA/5.79%	53AA/14.60%	139AA/38.29%	3ujg.2	42.0969	5.77	5856	unstable	-0.562	Nucleus	no	3A	631575444	631579962	identifed in this study
TaSnRK2.7-B	TraesCS3B02G413800	TraesCS3B02G413800.1						42.177	5.86	5871	unstable	-0.588	Nucleus	no	3B	650797001	650801750	TaSnRK2.6 (Zhang et al. 2016)
TaSnRK2.7-D	TraesCS3D02G374300	TraesCS3D02G374300.1						42.178	5.86	5874	unstable	-0.574	Nucleus	no	3D	487807055	487811579	TaSnRK2.4 (Mao et al. 2009)
TaSnRK2.8-A;a	TraesCS4A02G235600	TraesCS4A02G235600.1	99AA/30.00%	22AA/6.67%	55AA/16.67%	154AA/46.67%	3zuu.2	37.1431	4.68	5172	unstable	-0.261	Nucleus	no	4A	544198215	544201187	TaSnRK2.10 (Zhang et al. 2016)
TaSnRK2.8-A;b		TraesCS4A02G235600.2						40.6472	4.8	5665	stable	-0.278	Nucleus	no	4A	544198215	544201187	identifed in this study
TaSnRK2.8-B	TraesCS4B02G079300	TraesCS4B02G079300.1						40.6312	4.8	5664	stable	-0.271	Nucleus	no	4B	76816569	76819507	identifed in this study
TaSnRK2.8-D;a	TraesCS4D02G078100	TraesCS4D02G078100.1						26.7543	4.38	3727	stable	-0.281	Nucleus	no	4D	52470433	52472340	identifed in this study
TaSnRK2.8-D;b		TraesCS4D02G078100.2						40.6472	4.8	5665	stable	-0.278	Nucleus	no	4D	52470433	52473315	identifed in this study
TaSnRK2.9-A	TraesCS5A02G069500	TraesCS5A02G069500.1	137AA/38.06%	24AA/6.67%	56AA/15.56%	143AA/39.72%	5wax.2	40.3272	4.94	5641	stable	-0.191	Nucleus	no	5A	78157536	78160032	TaSnRK2.9 (Zhang et al. 2016)
TaSnRK2.9-B	TraesCS5B02G075800	TraesCS5B02G075800.1						40.6595	4.89	5679	stable	-0.217	Nucleus	no	5B	90507294	90509733	identifed in this study
TaSnRK2.9-D	TraesCS5D02G081700	TraesCS5D02G081700.1						40.5854	4.89	5673	stable	-0.185	Nucleus	no	5D	82186877	82189457	identifed in this study
TaSnRK2.10-A	TraesCS5A02G401700	TraesCS5A02G401700.1	122AA/33.33%	27AA/7.38%	60AA/16.39%	157AA/42.90%	3zuu.2	41.5904	4.87	5792	unstable	-0.315	Nucleus	no	5A	594570844	594577495	TaSnRK2.8 (Mao et al. 2010)
TaSnRK2.10-B	TraesCS5B02G406400	TraesCS5B02G406400.1						41.5904	4.87	5792	unstable	-0.315	Nucleus	no	5B	582578186	582584645	TaSnRK2.8 (Mao et al. 2010)
TaSnRK2.10-D;a	TraesCS5D02G411900	TraesCS5D02G411900.1						41.5904	4.87	5792	unstable	-0.315	Nucleus	no	5D	475302359	475309094	TaSnRK2.8 (Mao et al. 2010)
TaSnRK2.10-D;b		TraesCS5D02G411900.2						41.6304	4.97	5800	unstable	-0.341	Nucleus	no	5D	475302359	475309094	identifed in this study
TaSnRK2.11-A;a	TraesCS7A02G539000	TraesCS7A02G539000.1	112AA/38.10%	15AA/5.10%	46AA/15.65%	121AA/41.16%	5wax.2	33.292	6.01	4665	unstable	-0.312	Nucleus	no	7A	716239186	716241006	identifed in this study
TaSnRK2.11-A;b		TraesCS7A02G539000.2						33.4202	6.01	4682	unstable	-0.322	Nucleus	no	7A	716239186	716241006	identifed in this study
SnRK3
TaSnRK3.1-A;a	TraesCS1A02G080500	TraesCS1A02G080500.1	179AA/38.41%	43AA/9.23%	80AA/17.17%	164AA/35.19%	5iso.2	51.7665	7.65	7305	stable	-0.243	Nucleus	no	1A	63327891	63331958	TaCIPK17_1A1 (Sun et al. 2015)
TaSnRK3.1-A;b		TraesCS1A02G080500.2						51.8947	8.04	7326	stable	-0.251	Nucleus	no	1A	63327891	63331958	identifed in this study
TaSnRK3.1-B	TraesCS1B02G098600	TraesCS1B02G098600.1						51.8385	7.64	7306	stable	-0.267	Nucleus	no	1B	105107670	105111654	TaCIPK17_1B1 (Sun et al. 2015)
TaSnRK3.1-D	TraesCS1D02G082200	TraesCS1D02G082200.1						51.7052	6.74	7283	stable	-0.277	Nucleus	no	1D	64138723	64142375	TaCIPK17_1D1 (Sun et al. 2015)
TaSnRK3.2-A	TraesCS1A02G080700	TraesCS1A02G080700.1	191AA/40.55%	45AA/9.55%	83AA/17.62%	152AA/32.27%	5iso.2	52.0486	7.68	7333	stable	-0.263	Nucleus	no	1A	63741495	63747947	TaCIPK17_1A2 (Sun et al. 2015)
TaSnRK3.2-B;a	TraesCS1B02G098700	TraesCS1B02G098700.1						49.6489	6.95	7012	stable	-0.229	Nucleus	no	1B	105257295	105261808	TaCIPK17_1B2 (Sun et al. 2015)
TaSnRK3.2-B;b		TraesCS1B02G098700.2						51.6722	6.79	7285	stable	-0.255	Nucleus	no	1B	105257295	105261808	identifed in this study
TaSnRK3.2-D;a	TraesCS1D02G082600	TraesCS1D02G082600.1						51.625	6.95	7270	stable	-0.261	Nucleus	no	1D	64881077	64885760	TaCIPK17_1D2 (Sun et al. 2015)
TaSnRK3.2-D;b		TraesCS1D02G082600.2						49.6539	7.23	7005	stable	-0.228	Nucleus	no	1D	64881077	64885760	identifed in this study
TaSnRK3.3-A	TraesCS1A02G299600	TraesCS1A02G299600.1	181AA/38.35%	49AA/10.38%	72AA/15.25%	170AA/36.02%	5iso.2	53.6127	9.35	7594	stable	-0.488	Nucleus	no	1A	494449856	494452574	TaCIPK28_1A (Sun et al. 2015)
TaSnRK3.3-B	TraesCS1B02G309400	TraesCS1B02G309400.1						53.7169	9.45	7618	stable	-0.476	Nucleus	no	1B	532172311	532174949	TaCIPK28_1B (Sun et al. 2015)
TaSnRK3.3-D	TraesCS1D02G298500	TraesCS1D02G298500.1						53.7308	9.39	7613	stable	-0.492	Nucleus	no	1D	397079781	397082358	TaCIPK28_1D (Sun et al. 2015)
TaSnRK3.4-A;a	TraesCS2A02G098300	TraesCS2A02G098300.1	182AA/40.72%	46AA/10.29%	78AA/17.45%	141AA/31.54%	4czt.3	50.444	8.69	7147	stable	-0.371	Nucleus	no	2A	51582227	51590696	TaCIPK3_2A (Sun et al. 2015)
TaSnRK3.4-A;b		TraesCS2A02G098300.2						49.0927	9.15	6968	stable	-0.347	Nucleus	no	2A	51587073	51590696	identifed in this study
TaSnRK3.4-B;a	TraesCS2B02G114000	TraesCS2B02G114000.1						50.461	8.7	7147	stable	-0.392	Nucleus	no	2B	77173187	77177473	TaCIPK3_2B (Sun et al. 2015)
TaSnRK3.4-B;b		TraesCS2B02G114000.2						49.1788	9.21	6980	stable	-0.379	Nucleus	no	2B	77173187	77177473	identifed in this study
TaSnRK3.4-D;a	TraesCS2D02G097700	TraesCS2D02G097700.1						50.533	8.6	7143	stable	-0.414	Nucleus	no	2D	49879249	49884545	TaCIPK3_2D (Sun et al. 2015)
TaSnRK3.4-D;b		TraesCS2D02G097700.2						48.0592	8.86	6804	stable	-0.401	Nucleus	no	2D	49880562	49884545	identifed in this study
TaSnRK3.5-A	TraesCS2A02G106500	TraesCS2A02G106500.1	150AA/34.64%	43AA/9.93%	81AA/18.71%	159AA/36.72%	5iso.2	47.0206	6.72	6609	stable	-0.133	Nucleus	no	2A	58548059	58550982	TaCIPK29_2A (Sun et al. 2015)
TaSnRK3.5-B	TraesCS2B02G124100	TraesCS2B02G124100.1						47.3629	6.48	6650	stable	-0.171	Nucleus	no	2B	92489631	92490941	TaCIPK29_2B (Sun et al. 2015)
TaSnRK3.5-D	TraesCS2D02G107100	TraesCS2D02G107100.1						47.3909	6.77	6662	stable	-0.169	Nucleus	no	2D	59450417	59453054	TaCIPK29_2D (Sun et al. 2015)
TaSnRK3.6-A;a	TraesCS2A02G150600	TraesCS2A02G150600.1	155AA/37.17%	43AA/10.31%	74AA/17.75%	145AA/34.77%	6b1u.3	47.4984	7.57	6666	stable	-0.432	Nucleus	no	2A	98139145	98144205	TaCIPK21_2A (Sun et al. 2015)
TaSnRK3.6-A;b		TraesCS2A02G150600.2						51.0154	7.13	7160	stable	-0.412	Nucleus	no	2A	98139145	98144205	identifed in this study
TaSnRK3.6-B;a	TraesCS2B02G175800	TraesCS2B02G175800.1						47.4865	7.58	6666	stable	-0.43	Nucleus	no	2B	150712800	150717716	TaCIPK21_2B (Sun et al. 2015)
TaSnRK3.6-B;b		TraesCS2B02G175800.2						51.0195	7.15	7161	stable	-0.415	Nucleus	no	2B	150712800	150717716	identifed in this study
TaSnRK3.6-D	TraesCS2D02G155700	TraesCS2D02G155700.1						51.0414	6.84	7160	stable	-0.416	Nucleus	no	2D	99134815	99139724	TaCIPK21_2D (Sun et al. 2015)
TaSnRK3.7-A	TraesCS2A02G251800	TraesCS2A02G251800.1	181AA/39.26%	51AA/11.06%	83AA/18.00%	146AA/31.67%	4czt.3	51.7403	9.15	7302	stable	-0.429	Nucleus	no	2A	382807166	382811070	TaCIPK23_2A (Sun et al. 2015)
TaSnRK3.7-B	TraesCS2B02G271700	TraesCS2B02G271700.1						51.7973	9.15	7309	stable	-0.429	Nucleus	no	2B	373301321	373305756	TaCIPK23_2B (Sun et al. 2015)
TaSnRK3.7-D	TraesCS2D02G252600	TraesCS2D02G252600.1						50.9504	9.16	7193	stable	-0.434	Nucleus	no	2D	304640756	304644667	TaCIPK23_2D (Sun et al. 2015)
TaSnRK3.8-A	TraesCS2A02G536100	TraesCS2A02G536100.1	170AA/39.35%	40AA/9.26%	73AA/16.90%	149AA/34.49%	5iso.2	47.9281	6.41	6749	unstable	-0.167	Nucleus	no	2A	750530072	750531575	TaCIPK22_2A (Sun et al. 2015)
TaSnRK3.8-B	TraesCS2B02G566800	TraesCS2B02G566800.1						47.8921	8.46	6756	unstable	-0.156	Nucleus	no	2B	758084174	758085608	TaCIPK22_2B (Sun et al. 2015)
TaSnRK3.8-D	TraesCS2D02G537400	TraesCS2D02G537400.1						48.0692	7.68	6761	unstable	-0.216	Nucleus	no	2D	619332825	619334207	TaCIPK22_2D (Sun et al. 2015)
TaSnRK3.9-A	TraesCS3A02G135500	TraesCS3A02G135500.1	166AA/35.62%	43AA/9.23%	83AA/17.81%	174AA/37.34%	5iso.2	52.4434	9.25	7423	stable	-0.445	Nucleus	no	3A	112957446	112958846	TaCIPK5_3A (Sun et al. 2015)
TaSnRK3.9-B	TraesCS3B02G169300	TraesCS3B02G169300.1						52.2351	9.34	7398	stable	-0.476	Nucleus	no	3B	169627115	169630940	TaCIPK5_3B (Sun et al. 2015)
TaSnRK3.9-D	TraesCS3D02G151500	TraesCS3D02G151500.1						52.165	9.34	7391	stable	-0.473	Nucleus	no	3D	116042453	116043847	TaCIPK5_3D (Sun et al. 2015)
TaSnRK3.10-A	TraesCS3A02G135700	TraesCS3A02G135700.1	187AA/35.82%	58AA/11.11%	79AA/15.13%	198AA/37.93%	5iso.2	57.2089	8.11	8004	unstable	-0.316	Nucleus	no	3A	113340512	113342609	identifed in this study
TaSnRK3.10-B	TraesCS3B02G153800	TraesCS3B02G153800.1						56.9267	8.06	7961	unstable	-0.31	Nucleus	no	3B	146181327	146183340	TaCIPK13_3B (Sun et al. 2015)
TaSnRK3.10-D	TraesCS3D02G136700	TraesCS3D02G136700.1						56.9657	8.38	7970	unstable	-0.303	Nucleus	no	3D	95244740	95246725	TaCIPK13_3D (Sun et al. 2015)
TaSnRK3.11-A	TraesCS3A02G200900	TraesCS3A02G200900.1	161AA/35.86%	48AA/10.69%	85AA/18.93%	155AA/34.52%	5iso.2	50.5138	7.67	7138	stable	-0.33	Nucleus	no	3A	333305453	333328967	identifed in this study
TaSnRK3.11-B	TraesCS3B02G225800	TraesCS3B02G225800.1						50.5517	6.59	7131	unstable	-0.337	Nucleus	no	3B	312148349	312189729	TaCIPK8_3B (Sun et al. 2015)
TaSnRK3.11-D;a	TraesCS3D02G203000	TraesCS3D02G203000.2						45.5433	9.02	6448	unstable	-0.224	Nucleus	no	3D	250914921	250933264	TaCIPK8_3D (Sun et al. 2015)
TaSnRK3.11-D;b		TraesCS3D02G203000.3						46.0296	8.52	6500	unstable	-0.41	Nucleus	no	3D	250914921	250933264	identifed in this study
TaSnRK3.11-D;c		TraesCS3D02G203000.4						50.5898	7.16	7144	unstable	-0.326	Nucleus	no	3D	250914921	250933264	identifed in this study
TaSnRK3.11-D;d		TraesCS3D02G203000.5						50.4607	7.67	7128	unstable	-0.319	Nucleus	no	3D	250914921	250933264	identifed in this study
TaSnRK3.12-A	TraesCS3A02G306000	TraesCS3A02G306000.1	180AA/37.74%	40AA/8.39%	78AA/16.35%	179AA/37.53%	5iso.2	53.2769	9.41	7513	unstable	-0.371	Nucleus	no	3A	542228909	542230823	TaCIPK30_A (Sun et al. 2015)
TaSnRK3.12-B	TraesCS3B02G330500	TraesCS3B02G330500.1						52.281	9.51	7392	stable	-0.337	Nucleus	no	3B	534535637	534537390	identifed in this study
TaSnRK3.12-D	TraesCS3D02G295900	TraesCS3D02G295900.1						53.2609	9.43	7507	stable	-0.388	Nucleus	no	3D	409010959	409012798	identifed in this study
TaSnRK3.13-A	TraesCS3A02G346100	TraesCS3A02G346100.1	173AA/34.12%	45AA/8.88%	77AA/15.19%	212AA/41.81%	6b1u.3	57.5779	8.75	8151	unstable	-0.545	Nucleus	no	3A	595433942	595436796	TaCIPK11_3A (Sun et al. 2015)
TaSnRK3.13-B	TraesCS3B02G377800	TraesCS3B02G377800.1						57.4707	8.75	8127	unstable	-0.541	Nucleus	no	3B	595287750	595290341	TaCIPK11_3B (Sun et al. 2015)
TaSnRK3.13-D	TraesCS3D02G339800	TraesCS3D02G339800.1						57.4257	8.51	8128	unstable	-0.521	Nucleus	no	3D	453096508	453099107	TaCIPK11_3D (Sun et al. 2015)
TaSnRK3.14-A	TraesCS3A02G446800	TraesCS3A02G446800.1	149AA/34.49%	41AA/9.49%	83AA/19.21%	159AA/36.81%	6c9d.2	47.696	9.13	6751	unstable	-0.204	Nucleus	no	3A	686863179	686864625	identifed in this study
TaSnRK3.14-B	TraesCS3B02G482200	TraesCS3B02G482200.1						47.6539	9.19	6747	unstable	-0.196	Nucleus	no	3B	729414682	729415980	identifed in this study
TaSnRK3.14-D	TraesCS3D02G439400	TraesCS3D02G439400.1						47.6479	8.68	6733	unstable	-0.177	Nucleus	no	3D	549704928	549706386	identifed in this study
TaSnRK3.15-A;a	TraesCS4A02G126800	TraesCS4A02G126800.1	174AA/39.28%	44AA/9.93%	75AA/16.93%	150AA/33.86%	4czt.3	50.2608	8	7113	stable	-0.381	Nucleus	no	4A	163825377	163830254	TaCIPK31_4A (Sun et al. 2015)
TaSnRK3.15-A;b		TraesCS4A02G126800.2						48.2073	8.46	6809	stable	-0.466	Nucleus	no	4A	163825377	163830254	identifed in this study
TaSnRK3.15-A;c		TraesCS4A02G126800.3						51.1559	8.27	7246	stable	-0.369	Nucleus	no	4A	163825377	163830254	identifed in this study
TaSnRK3.15-A;d		TraesCS4A02G126800.4						50.9697	8.27	7219	stable	-0.379	Nucleus	no	4A	163825377	163830254	identifed in this study
TaSnRK3.15-B;a	TraesCS4B02G178100	TraesCS4B02G178100.1						50.9837	8.27	7222	stable	-0.373	Nucleus	no	4B	389464002	389467714	TaCIPK31_4B (Sun et al. 2015)
TaSnRK3.15-B;b		TraesCS4B02G178100.2						50.2748	8	7116	stable	-0.375	Nucleus	no	4B	389464002	389467714	identifed in this study
TaSnRK3.15-D;a	TraesCS4D02G179700	TraesCS4D02G179700.1						43.429	8.06	6159	stable	-0.363	Nucleus	no	4D	312791129	312796052	TaCIPK31_4D (Sun et al. 2015)
TaSnRK3.15-D;b		TraesCS4D02G179700.2						50.9256	8.27	7212	stable	-0.378	Nucleus	no	4D	312791129	312796052	identifed in this study
TaSnRK3.15-D;c		TraesCS4D02G179700.3						50.2167	8	7106	stable	-0.38	Nucleus	no	4D	312791129	312796052	identifed in this study
TaSnRK3.16-A;a	TraesCS4A02G136500	TraesCS4A02G136500.1	165AA/37.67%	46AA/10.50%	79AA/18.04%	148AA/33.79%	6c9h.2	49.9528	9.1	7075	stable	-0.356	Nucleus	no	4A	191118052	191121058	TaCIPK10_4A (Sun et al. 2015)
TaSnRK3.16-A;b		TraesCS4A02G136500.2						50.3423	9.15	7134	stable	-0.347	Nucleus	no	4A	191119643	191121423	identifed in this study
TaSnRK3.16-B	TraesCS4B02G168200	TraesCS4B02G168200.1						22.1136	8.52	3128	stable	-0.214	Nucleus	no	4B	367927070	367927651	TaCIPK10_4B (Sun et al. 2015)
TaSnRK3.16-D	TraesCS4D02G170700	TraesCS4D02G170700.1						49.9098	9.1	7070	stable	-0.332	Nucleus	no	4D	297205283	297220047	TaCIPK10_4D (Sun et al. 2015)
TaSnRK3.17-A	TraesCS4A02G187300	TraesCS4A02G187300.1	171AA/38.95%	43AA/9.79%	78AA/17.77%	147AA/33.49%	4czt.3	50.2597	7.66	7117	unstable	-0.475	Nucleus	no	4A	466570368	466575861	TaCIPK32_4A (Sun et al. 2015)
TaSnRK3.17-B	TraesCS4B02G131000	TraesCS4B02G131000.1						50.2488	7.19	7109	unstable	-0.466	Nucleus	no	4B	171608536	171613538	TaCIPK32_4B (Sun et al. 2015)
TaSnRK3.17-D	TraesCS4D02G126200	TraesCS4D02G126200.1						50.2597	7.66	7117	unstable	-0.475	Nucleus	no	4D	110111694	110117091	TaCIPK32_4D (Sun et al. 2015)
TaSnRK3.18-A	TraesCS4A02G194800	TraesCS4A02G194800.1	174AA/38.75%	45A/10.02%	78AA/17.37%	152AA/33.85%	6b1u.3	51.0358	9.19	7224	stable	-0.416	Nucleus	no	4A	476977837	476980583	TaCIPK14_4A (Sun et al. 2015)
TaSnRK3.18-B	TraesCS4B02G120400	TraesCS4B02G120400.1						50.2818	9.03	7108	stable	-0.429	Nucleus	no	4B	141427582	141428916	TaCIPK14_4B (Sun et al. 2015)
TaSnRK3.18-D	TraesCS4D02G118500	TraesCS4D02G118500.2						50.9347	9.13	7213	stable	-0.41	Nucleus	no	4D	99161360	99162709	TaCIPK14_4D (Sun et al. 2015)
TaSnRK3.19-A	TraesCS4A02G200000	TraesCS4A02G200000.1	160AA/36.45%	45AA/10.25%	90AA/20.50%	144AA/32.80%	6b1u.3	47.8361	8.94	6780	stable	-0.157	Nucleus	no	4A	488110425	488112320	identifed in this study
TaSnRK3.19-B	TraesCS4B02G115400	TraesCS4B02G115400.1						47.8792	9.08	6787	stable	-0.151	Nucleus	no	4B	132166215	132167951	identifed in this study
TaSnRK3.19-D	TraesCS4D02G113100	TraesCS4D02G113100.1						47.8672	9.12	6787	stable	-0.156	Nucleus	no	4D	93710051	93711864	identifed in this study
TaSnRK3.20-A	TraesCS5A02G492000	TraesCS5A02G492000.1	186aa/41.70%	39AA/8.74%	69aa/15.47%	152aa/34.08%	4czt.3	50.1074	7.67	7035	stable	-0.398	Nucleus	no	5A	661017152	661022159	TaCIPK9_5A (Sun et al. 2015)
TaSnRK3.20-B	TraesCS4B02G319900	TraesCS4B02G319900.1						49.7981	7.23	6994	unstable	-0.388	Nucleus	no	4B	611018334	611022561	TaCIPK9_4B (Sun et al. 2015)
TaSnRK3.20-D	TraesCS4D02G316500	TraesCS4D02G316500.1						50.0383	7.67	7027	stable	-0.407	Nucleus	no	4D	481614587	481618842	TaCIPK9_4D (Sun et al. 2015)
TaSnRK3.21-A	TraesCS5A02G057400	TraesCS5A02G057400.1	157AA/36.26%	425AA/9.70%	82AA/18.94%	152AA/35.10%	6c9d.2	47.621	9.19	6737	unstable	-0.187	Nucleus	no	5A	55018462	55019763	identifed in this study
TaSnRK3.21-B	TraesCS5B02G059300	TraesCS5B02G059300.1						47.4219	9.51	6711	unstable	-0.185	Nucleus	no	5B	65277989	65279643	TaCIPK4_5B (Sun et al. 2015)
TaSnRK3.21-D	TraesCS5D02G068700	TraesCS5D02G068700.1						47.517	9.28	6726	unstable	-0.166	Nucleus	no	5D	65753632	65755248	TaCIPK4_5D (Sun et al. 2015)
TaSnRK3.22-A	TraesCS5A02G148000	TraesCS5A02G148000.1	167AA/38.13%	48AA/10.96%	74AA/16.89%	149AA/34.02%	6c9d.2	49.1578	9.29	6987	stable	-0.378	Nucleus	no	5A	325930589	325933350	TaCIPK15_5A (Sun et al. 2015)
TaSnRK3.22-B	TraesCS5B02G146500	TraesCS5B02G146500.1						48.4811	9.38	6896	stable	-0.359	Nucleus	no	5B	275032060	275035080	TaCIPK15_5B (Sun et al. 2015)
TaSnRK3.22-D;a	TraesCS5D02G144800	TraesCS5D02G144800.1						49.2569	9.25	6988	stable	-0.387	Nucleus	no	5D	231350992	231353762	TaCIPK15_5D (Sun et al. 2015)
TaSnRK3.22-D;b		TraesCS5D02G144800.2						44.7889	9.32	6364	stable	-0.384	Nucleus	no	5D	231350992	231353762	identifed in this study
TaSnRK3.23-A	TraesCS5A02G225200	TraesCS5A02G225200.1	181AA/40.58%	49AA/10.99%	73AA/16.37%	143AA/32.06%	6b1u.3	47.9191	9.18	6779	stable	-0.142	Nucleus	no	5A	440733730	440735070	identifed in this study
TaSnRK3.23-B	TraesCS5B02G223800	TraesCS5B02G223800.1						48.0111	9.08	6785	stable	-0.143	Nucleus	no	5B	398625257	398626600	TaCIPK27_5B (Sun et al. 2015)
TaSnRK3.23-D	TraesCS5D02G232500	TraesCS5D02G232500.1						41.9282	8.73	5929	stable	-0.084	Nucleus	no	5D	339652596	339654075	identifed in this study
TaSnRK3.24-A	TraesCS5A02G225300	TraesCS5A02G225300.1	181AA/40.49%	45AA/10.07%	79AA/17.67%	142AA/31.77%	6c9h.2	49.5199	9.09	6975	stable	-0.177	Nucleus	no	5A	440947234	440948577	TaCIPK16_5A (Sun et al. 2015)
TaSnRK3.24-B	TraesCS5B02G223900	TraesCS5B02G223900.1						49.5049	9.09	6969	stable	-0.193	Nucleus	no	5B	398708092	398710177	TaCIPK16_5B (Sun et al. 2015)
TaSnRK3.24-D	TraesCS5D02G232600	TraesCS5D02G232600.1						49.4718	9	6960	stable	-0.195	Nucleus	no	5D	339712134	339713477	TaCIPK16_5D (Sun et al. 2015)
TaSnRK3.25-A	TraesCS5A02G377900	TraesCS5A02G377900.1	164AA/38.05%	40AA/9.28%	79AA/18.33%	148AA/34.34%	6c9h.2	47.1467	8.66	6681	unstable	-0.071	Nucleus	no	5A	575594327	575595945	TaCIPK7_5A (Sun et al. 2015)
TaSnRK3.25-B	TraesCS5B02G381500	TraesCS5B02G381500.1						47.1286	8.82	6679	unstable	-0.08	Nucleus	no	5B	559763470	559765063	TaCIPK7_5B (Sun et al. 2015)
TaSnRK3.25-D	TraesCS5D02G387900	TraesCS5D02G387900.1						47.2278	8.81	6695	unstable	-0.099	Nucleus	no	5D	457663678	457665461	TaCIPK7_5D (Sun et al. 2015)
TaSnRK3.26-A	TraesCS6A02G135100	TraesCS6A02G135100.1	168AA/34.93%	44AA/9.15%	82AA/17.05%	187AA/38.88%	5iso.2	54.5655	9.12	7738	unstable	-0.518	Nucleus	no	6A	107111934	107113379	TaCIPK26_6A (Sun et al. 2015)
TaSnRK3.26-B	TraesCS6B02G163100	TraesCS6B02G163100.1						55.736	9.12	7912	unstable	-0.485	Nucleus	no	6B	169316750	169319635	TaCIPK26_6B (Sun et al. 2015)
TaSnRK3.26-D	TraesCS6D02G124200	TraesCS6D02G124200.1						55.169	8.99	7809	unstable	-0.547	Nucleus	no	6D	89002438	89005275	TaCIPK26_6D (Sun et al. 2015)
TaSnRK3.27-A	TraesCS6A02G151000	TraesCS6A02G151000.1	199AA/37.62%	51AA/9.64%	86AA/16.26%	193AA/36.48%	4czt.3	59.0224	8.38	8276	unstable	-0.233	Nucleus	no	6A	135053305	135067604	TaCIPK20_6A (Sun et al. 2015)
TaSnRK3.27-B	TraesCS6B02G179100	TraesCS6B02G179100.1						48.8372	8.17	6909	stable	-0.181	Nucleus	no	6B	199073117	199076148	TaCIPK20_6B (Sun et al. 2015)
TaSnRK3.27-D	TraesCS6D02G141000	TraesCS6D02G141000.1						49.6537	6.19	7005	stable	-0.224	Nucleus	no	6D	110745298	110748354	TaCIPK20_6D (Sun et al. 2015)
TaSnRK3.28-A	TraesCS7A02G377600	TraesCS7A02G377600.1	177AA/39.69%	47AA/10.54%	81AA/18.16%	141AA/31.61%	5iso.2	50.0547	8.87	7072	stable	-0.214	Nucleus	no	7A	553036442	553043512	TaCIPK24_7A (Sun et al. 2015)
TaSnRK3.28-B	TraesCS7B02G279300	TraesCS7B02G279300.1						49.9217	8.78	7070	stable	-0.18	Nucleus	no	7B	511928111	511934290	TaCIPK24_7B (Sun et al. 2015)
TaSnRK3.28-D;a	TraesCS7D02G374400	TraesCS7D02G374400.1						45.0899	8.9	6365	stable	-0.264	Nucleus	no	7D	484724524	484730731	TaCIPK24_7D (Sun et al. 2015)
TaSnRK3.28-D;b		TraesCS7D02G374400.2						49.9936	8.78	7064	stable	-0.205	Nucleus	no	7D	484724524	484730731	identifed in this study
TaSnRK3.29-A	TraesCS3A02G305900	TraesCS3A02G305900.1	177AA/33.71%	48AA/9.14%	84AA/16.00%	216AA/41.14%	6b1u.3	58.5234	8.77	8265	unstable	-0.299	Nucleus	no	3A	542202377	542206577	TaCIPK19_3A (Sun et al. 2015)
TaSnRK3.29-B	TraesCS3B02G330600	TraesCS3B02G330600.1						51.4721	6.9	7258	stable	-0.202	Nucleus	no	3B	534961848	534965788	TaCIPK19_3B (Sun et al. 2015)
TaSnRK3.30-A	TraesCS1A02G333800	TraesCS1A02G333800.1	169AA/32.56%	53AA/10.21%	87AA/16.76%	210AA/40.46%	6c9d.2	57.9262	8.35	8143	unstable	-0.417	Nucleus	no	1A	521629027	521630592	TaCIPK12_1A (Sun et al. 2015)
TaSnRK3.30-B	TraesCS1B02G347100	TraesCS1B02G347100.1						58.0857	8.65	8194	unstable	-0.288	Nucleus	no	1B	576205415	576208862	TaCIPK12_1B (Sun et al. 2015)
TaSnRK3.31-A	TraesCS7A02G352200	TraesCS7A02G352200.1	174AA/31.35%	50AA/9.01%	92AA/ 16.58%	239AA/43.06%	6b1u.3	61.5076	8.96	8659	unstable	-0.323	Nucleus	no	7A	515879021	515880777	TaCIPK25_7A (Sun et al. 2015)
TaSnRK3.32-B;a	TraesCS6B02G006000	TraesCS6B02G006000.1	155AA/33.99%	47AA/10.31%	74AA/16.23%	180AA/39.47%	4czt.3	50.7994	8.61	7153	unstable	-0.311	Nucleus	no	6B	4295599	4313026	identifed in this study
TaSnRK3.32-B;b		TraesCS6B02G006000.2						97.5597	5.95	13739	stable	-0.316	Nucleus	no	6B	4295599	4313008	identifed in this study
TaSnRK3.32-B;c		TraesCS6B02G006000.3						99.576	6.34	14024	stable	-0.313	Nucleus	no	6B	4289578	4313026	identifed in this study
TaSnRK3.32-B;d		TraesCS6B02G006000.4						88.7187	6.03	12517	stable	-0.327	Nucleus	no	6B	4289578	4313026	identifed in this study
TaSnRK3.33-A	TraesCS1A02G080600	TraesCS1A02G080600.1	370AA/43.12%	77AA/8.97%	142AA/16.55%	269AA/31.35%	5iso.2	97.065	5.83	13680	stable	-0.371	Nucleus	no	1A	63475812	63481063	identifed in this study
TaSnRK3.34-D;a	TraesCS1D02G082500	TraesCS1D02G082500.1	169AA/36.27%	41AA/8.80%	80AA/17.17%	176AA/37.77%	5iso.2	51.5481	7.22	7263	stable	-0.238	Nucleus	no	1D	64417145	64421396	identifed in this study
TaSnRK3.34-D;b		TraesCS1D02G082500.2						53.0411	6.9	7495	stable	-0.159	Nucleus	no	1D	64417145	64421396	identifed in this study
TaSnRK3.34-D;c		TraesCS1D02G082500.3						50.8966	6.9	7200	stable	-0.168	Nucleus	no	1D	64417145	64421396	identifed in this study
TaSnRK3.35-A	TraesCS2A02G107000	TraesCS2A02G107000.1	158AA/30.33%	48AA/9.21%	85AA/16.31%	230AA/44.15%	6b1u.3	57.9932	8.39	8150	unstable	-0.429	Nucleus	no	2A	59322641	59323999	TaCIPK2_2A (Sun et al. 2015)
TaSnRK3.36-A	TraesCS2A02G436400	TraesCS2A02G436400.1	139AA/39.04%	43AA/12.08%	75AA/21.07%	99AA/27.81%	4czt.3	40.1115	8.94	5678	stable	-0.345	Nucleus	no	2A	688424481	688434711	identifed in this study
TaSnRK3.37-D	TraesCS2D02G106800	TraesCS2D02G106800.1	165AA/36.50%	52AA/11.50%	79AA/17.48%	156AA/34.51%	6b1u.3	51.0091	9.13	7211	stable	-0.391	Nucleus	no	2D	59005695	59009533	TaCIPK2_2D (Sun et al. 2015)
TaSnRK3.38-B	TraesCS2B02G567900	TraesCS2B02G567900.1	165AA/36.18%	48AA/10.53%	78AA/17.11%	165AA/36.18%	6b1u.3	51.5657	9.07	7282	stable	-0.43	Nucleus	no	2B	758807538	758808916	identifed in this study
TaSnRK3.39-D	TraesCS2D02G537600	TraesCS2D02G537600.1	121AA/38.17%	31AA/9.78%	51AA/16.09%	114AA/35.96%	6b1u.3	35.5097	5.34	4976	stable	-0.162	Nucleus	no	2D	619371078	619372722	identifed in this study
TaSnRK3.40-A	TraesCS3A02G178900	TraesCS3A02G178900.1	162AA/37.41%	40AA/9.24%	77AA/17.78%	154AA/35.57%	6c9d.2	47.848	8.46	6753	unstable	-0.173	Nucleus	no	3A	204865876	204879508	identifed in this study
TaSnRK3.41-D	TraesCS1D02G457900LC	TraesCS1D02G457900LC.1	153AA/28.92%	53AA/10.02%	83AA/15.69%	240AA/45.37%	6c9d.2	58.9014	8.41	8288	unstable	-0.426	Nucleus	no	1D	426586838	426588427	identifed in this study
TaSnRK3.42-B	TraesCS4B02G307100LC	TraesCS4B02G307100LC.1	60AA/40.27%	11AA/7.38%	26AA/17.45%	52AA/34.90%	6c9d.2	16.8613	5.71	2369	unstable	-0.449	Nucleus	no	4B	367926499	367926948	identifed in this study
TaSnRK3.43-D	TraesCS7D02G501400LC	TraesCS7D02G501400LC.1	167AA/32.49%	53AA/10.31%	76AA/14.79%	218AA/42.41%	6c9d.2	56.9914	9.03	8033	unstable	-0.331	Nucleus	no	7D	479287809	479289353	identifed in this study
TaSnRK3.44-U	TraesCSU02G269700LC	TraesCSU02G269700LC.1	56AA/37.58%	13AA/8.72%	26AA/17.45%	54AA/36.24%	6c9d.2	16.8433	5.71	2371	unstable	-0.436	Nucleus	no	Un	214474252	214474701	identifed in this study
Len, Length (aa); MW, molecular weight (kD); pI, Isoelectric point; ato, atoms numbe; GRAVY, Grand aver age of hydropathicit; Sig, Signal peptide; Sub, Subcellular Localization.
1. S. J. Tian, X. G. Mao, H. Y. Zhang, S. S. Chen, C. C. Zhai, S. M. Yang, R. L. Jing, Cloning and characterization of TaSnRK2.3, a novel SnRK2 gene in common wheat, Journal of Experimental Botany, 7 (2013) 2063–2080.
2. H. Y. Zhang, W. Y. Li, X. G. Mao, R. L. Jing, H. F. Jia, Differential activation of the wheat snrk2 family by abiotic stresses, Frontiers in Plant Science. 7 (2016) 420.
3. H. Y. Zhang, X. Mao, R. L. Jing, X. P. Chang, H. M. Xie, Characterization of a common wheat (Triticum aestivum L.) TaSnRK2.7 gene involved in abiotic stress responses, Journal of Experimental Botany. 3 (2011) 975-988.
4. X. G. Mao, H. Y. Zhang, S. J. Tian, X. P. Chang, R. l. Jing, TaSnRK2.4, an SNF1-type serine/threonine protein kinase of wheat (Triticum aestivum L.), confers enhanced multistress tolerance in Arabidopsis, Journal of Experimental Botany. 3 (2010) 683-696.
5. T. Sun, Y. Wang, M. Wang, T. T. Li, Y. Zhou, X. T. Wang, S. Y. Wei, G. Y. He, G. X. Yang, Identification and comprehensive analyses of the CBL and CIPK, gene families in wheat (Triticum aestivum L.), BMC Plant Biology. 15 (2015) 269.
